# Supplementary material for: D–A type luminophores with a twisted molecular conformation constructed by phenoxazine and diphenylsulfone showing high contrast mechanofluorochromism
Source: Royal Society of Chemistry journal article supplement (doi:10.1039/d0nj04178e), 2020-01-01
Supplement: d0nj04178e1.pdf [file d0nj04178e1.pdf]

## Supporting Information for

### **D-A type luminophores with twisted molecular conformation constructed by phenoxazine and diphenylsulfone showing high contrast mechanofluorochromism**

Hongke Zhou,<sup>a</sup> Zhan Zhang,<sup>a</sup> Xingliang Liu,<sup>a</sup> Defang Xu,<sup>b\*</sup> Weidong Zhang,<sup>a</sup> Shengjie Fu,<sup>a</sup> Xiucun Feng<sup>a</sup> and Qian Huang<sup>a</sup>

<sup>a</sup>School of Chemical Engineering, Qinghai University, Xining 810016, China

<sup>b</sup>State Key Laboratory of Plateau Ecology and Agriculture, Qinghai University, Xining 810016, China

E-mail address: [xudefang123@163.com](mailto:xudefang123@163.com).

**Table S1.** Crystallographic experimental details for **PTZ-DPS** (CCDC 1969955) and **BPTZ-DPS** (CCDC 1969954).

| Compound                                    | <b>PTZ-DPS</b>                                                | <b>BPTZ-DPS</b>                                                 |
|---------------------------------------------|---------------------------------------------------------------|-----------------------------------------------------------------|
| Empirical formula                           | C <sub>28</sub> H <sub>22</sub> BrNO <sub>3</sub> S           | C <sub>44</sub> H <sub>36</sub> N <sub>2</sub> O <sub>4</sub> S |
| Formula weight                              | 532.43                                                        | 688.81                                                          |
| Temperature/K                               | 293.51(10)                                                    | 293.50(10)                                                      |
| Crystal system                              | triclinic                                                     | monoclinic                                                      |
| Space group                                 | P-1                                                           | P2/c                                                            |
| a/Å                                         | 9.9624(5)                                                     | 13.9869(6)                                                      |
| b/Å                                         | 13.4464(7)                                                    | 5.09616(15)                                                     |
| c/Å                                         | 19.3712(10)                                                   | 24.4610(8)                                                      |
| α/°                                         | 87.677(4)                                                     | 90                                                              |
| β/°                                         | 76.294(5)                                                     | 104.972(4)                                                      |
| γ/°                                         | 73.020(5)                                                     | 90                                                              |
| Volume/Å <sup>3</sup>                       | 2410.0(2)                                                     | 1684.38(11)                                                     |
| Z                                           | 43.384                                                        | 2                                                               |
| ρ <sub>calc</sub> /g/cm <sup>3</sup>        | 1.467                                                         | 1.358                                                           |
| μ/mm <sup>-1</sup>                          | 3.384                                                         | 1.248                                                           |
| F(000)                                      | 1088.0                                                        | 724.0                                                           |
| Crystal size/mm <sup>3</sup>                | 0.13 × 0.11 × 0.07                                            | 0.19 × 0.15 × 0.12                                              |
| Radiation                                   | CuKα (λ = 1.54184)                                            | CuKα (λ = 1.54184)                                              |
| 2θ range for data collection/°              | 20.088 to 133.198                                             | 7.482 to 133.188                                                |
| Index ranges                                | -11 ≤ h ≤ 9, -15 ≤ k ≤ 14, -23 ≤ l ≤ 20                       | -16 ≤ h ≤ 16, -6 ≤ k ≤ 3, -29 ≤ l ≤ 28                          |
| Reflections collected                       | 15163                                                         | 5537                                                            |
| Independent reflections                     | 8403 [R <sub>int</sub> = 0.0284, R <sub>sigma</sub> = 0.0399] | 2963 [R <sub>int</sub> = 0.0163, R <sub>sigma</sub> = 0.0221]   |
| Data/restraints/parameters                  | 8403/0/615                                                    | 2963/0/232                                                      |
| Goodness-of-fit on F <sup>2</sup>           | 1.021                                                         | 1.059                                                           |
| Final R indexes [I >= 2σ (I)]               | R <sub>1</sub> = 0.0472, wR <sub>2</sub> = 0.1251             | R <sub>1</sub> = 0.0405, wR <sub>2</sub> = 0.1054               |
| Final R indexes [all data]                  | R <sub>1</sub> = 0.0629, wR <sub>2</sub> = 0.1391             | R <sub>1</sub> = 0.0500, wR <sub>2</sub> = 0.1140               |
| Largest diff. peak/hole / e Å <sup>-3</sup> | 0.33/-0.65                                                    | 0.17/-0.29                                                      |



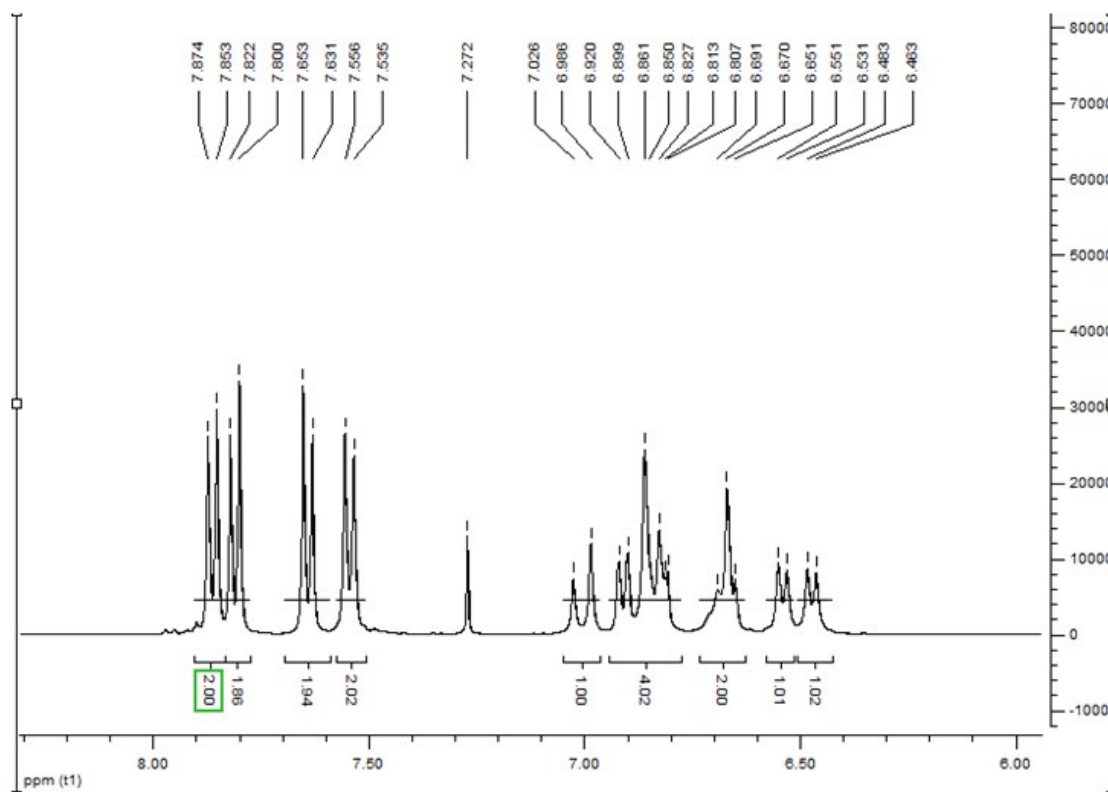

Fig. S3 <sup>1</sup>H NMR (400 MHz) spectrum of PXZ-DPS.

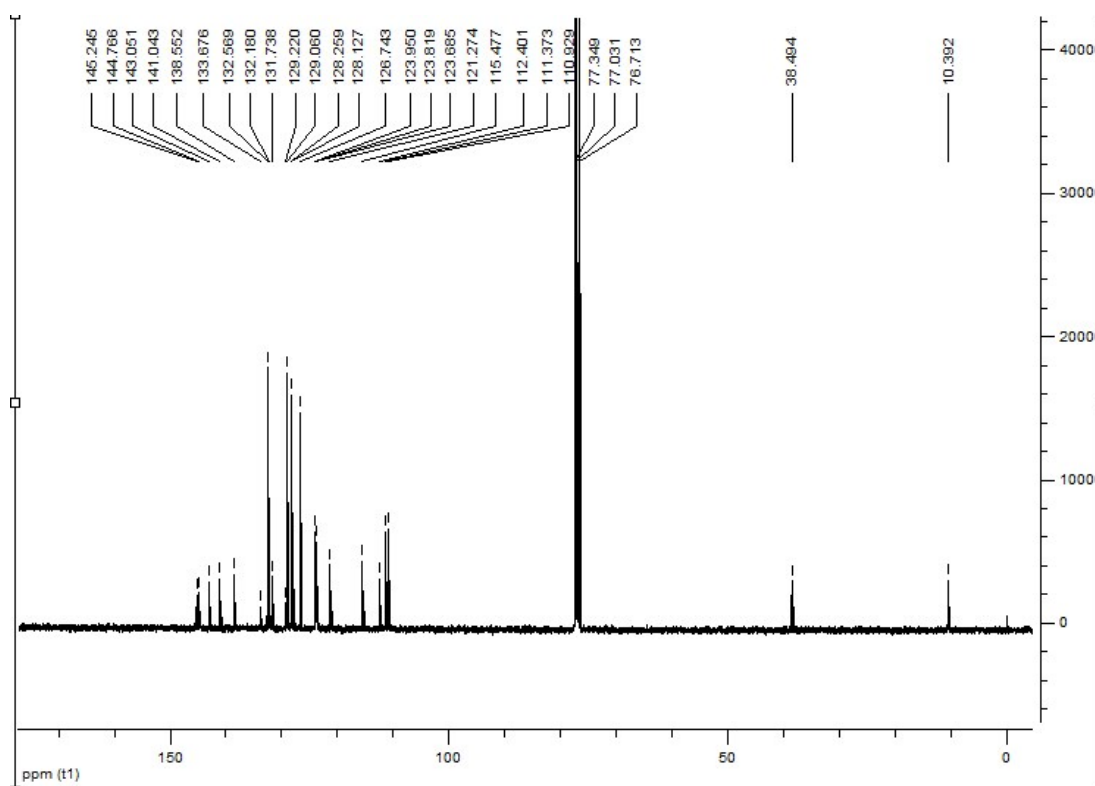

Fig. S4 <sup>13</sup>C NMR (100 MHz) spectrum of PXZ-DPS.

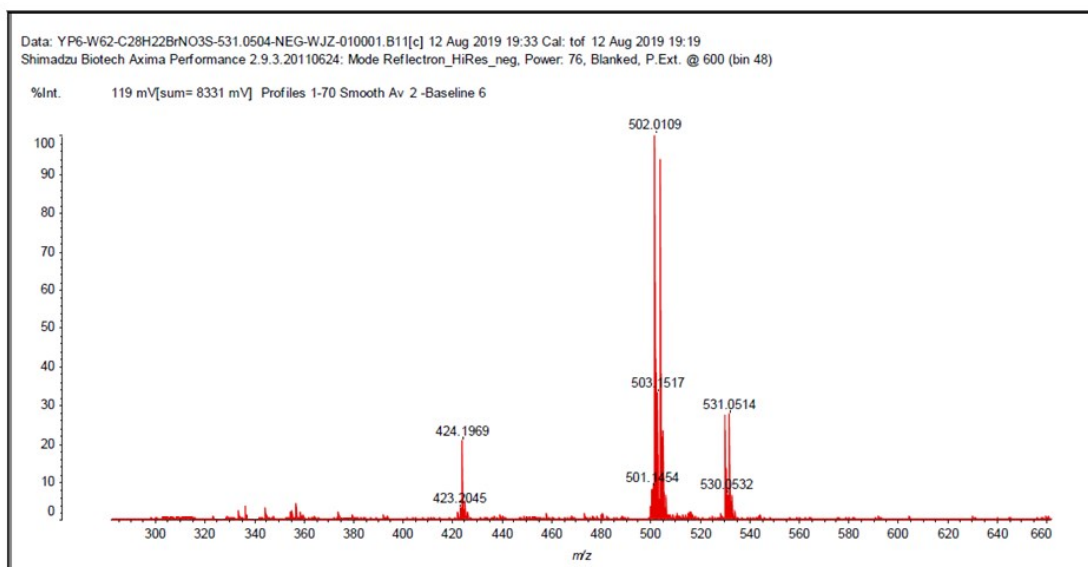

**Fig. S5** MALDI/TOF MS spectrum of **PXZ-DPS**.

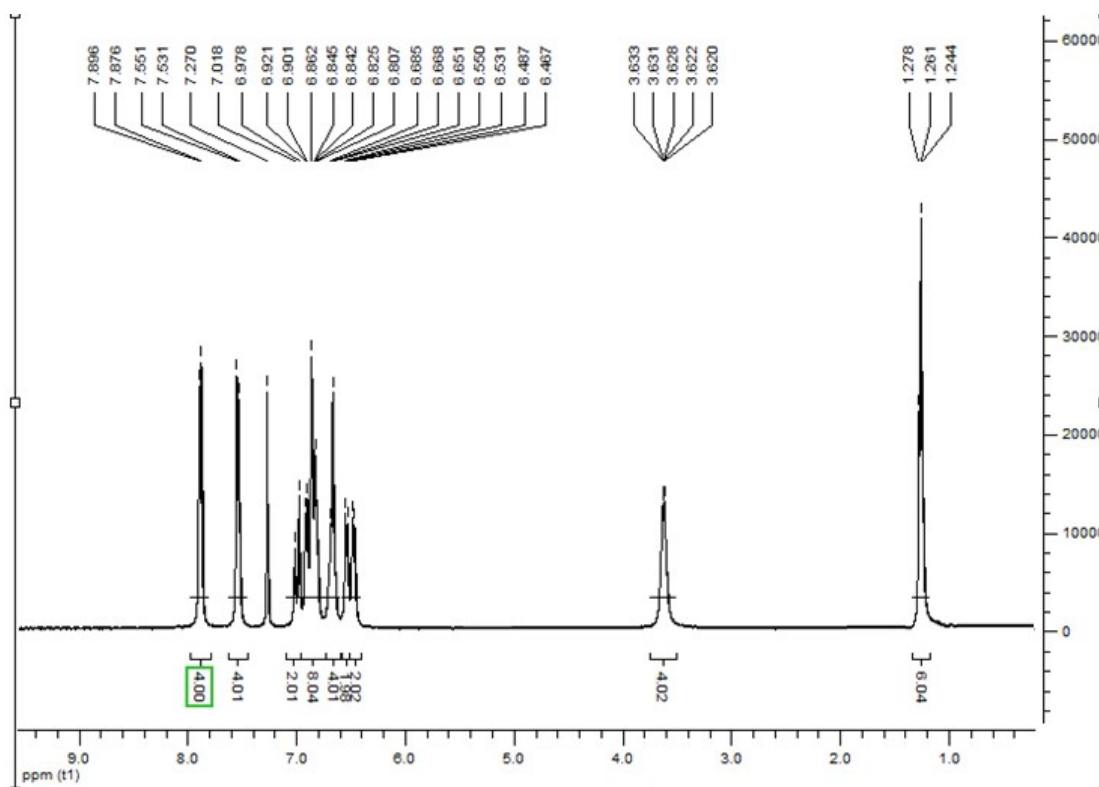

**Fig. S6**  $^1\text{H}$  NMR (400 MHz) spectrum of **BPXZ-DPS**.

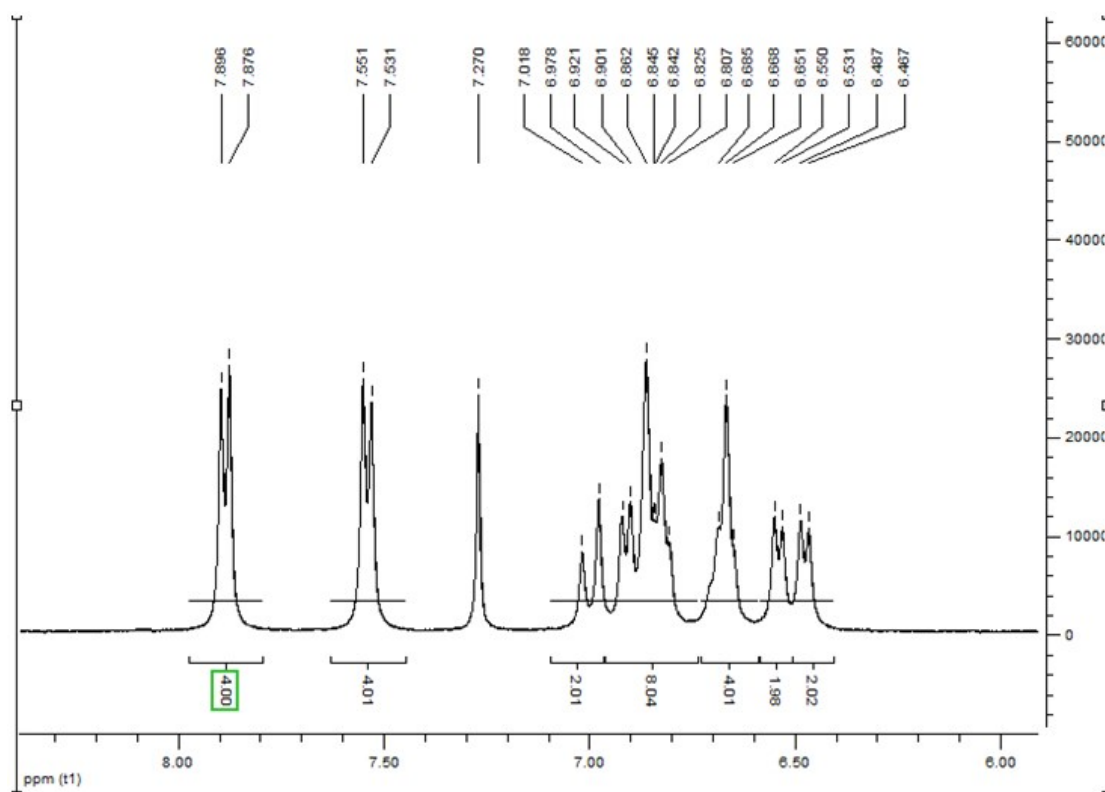

**Fig. S7**  $^1\text{H}$  NMR (400 MHz) spectrum of **BPXZ-DPS**.

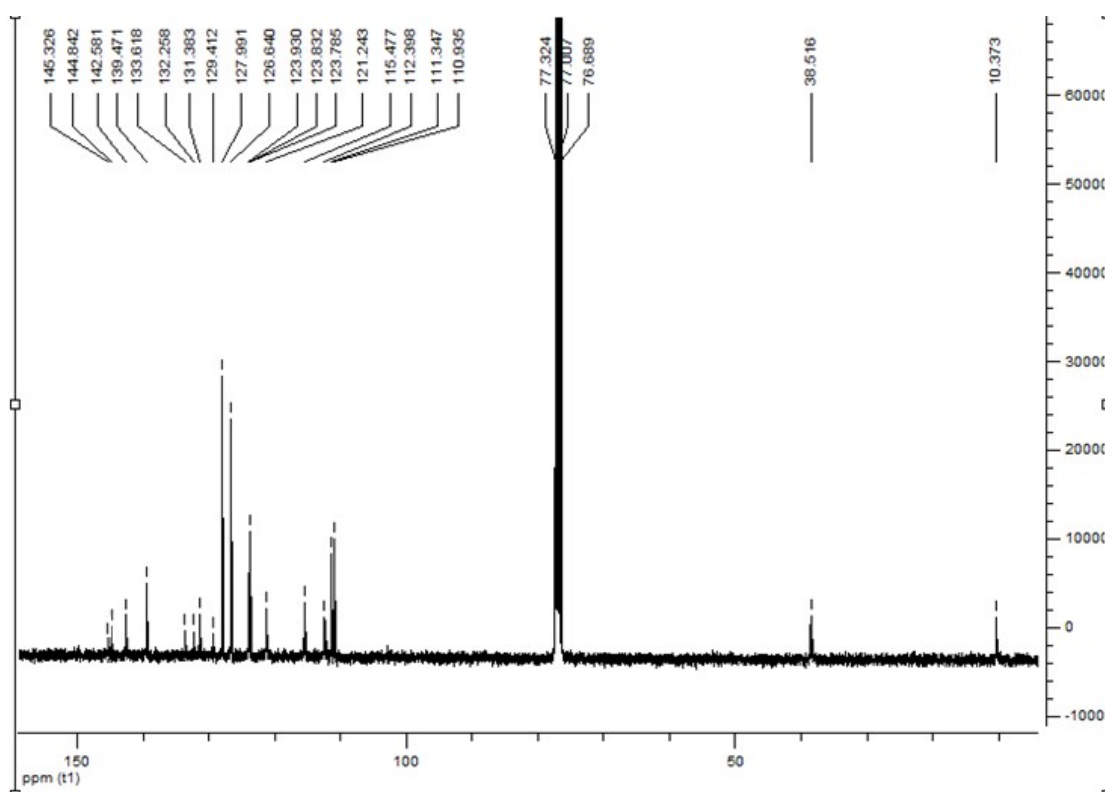

**Fig. S8**  $^{13}\text{C}$  NMR (100 MHz) spectrum of **BPXZ-DPS**.

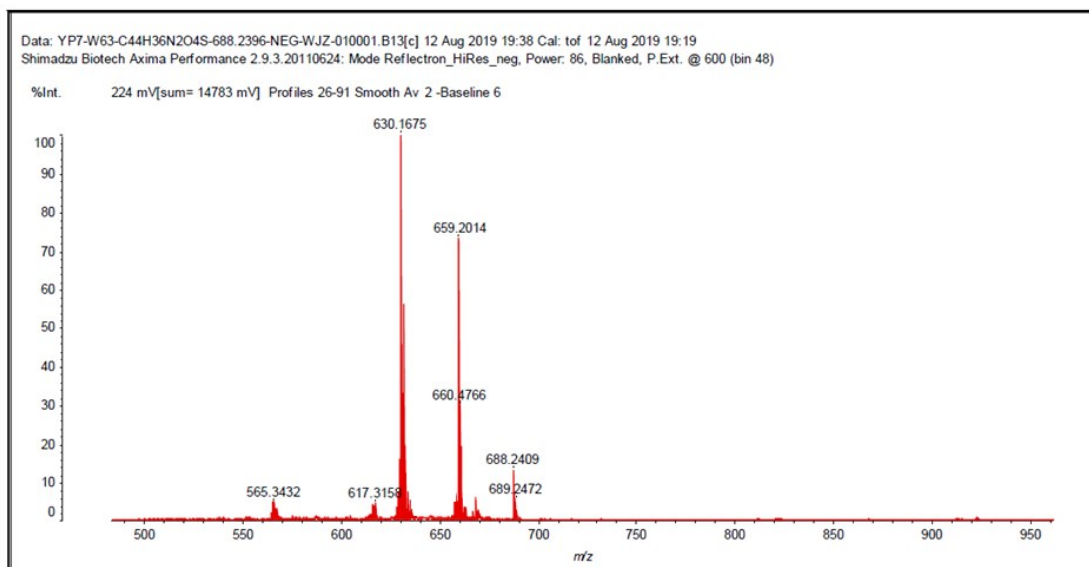

**Fig. S9** MALDI/TOF MS spectrum of **BPXZ-DPS**.
